# Supplementary material for: The role and interaction of imprinted genes in human fetal growth
Source: PubMed Central journal article supplement (PMC4305174; doi:10.1098/rstb.2014.0074), 2015-03-05
Supplement: rstb20140074supp1.pdf [file rstb20140074supp1.pdf]

## **The Role and Interaction of Imprinted Genes in Human Fetal Growth**

Gudrun E. Moore, Miho Ishida, Charalambos Demetriou, Lara Al-Olabi, Lydia J. Leon, Anna C. Thomas, Sayeda Abu-Amero, Jennifer M. Frost, Jaime L. Stafford, Yao Chaoqun, Andy Duncan, Rachel Baigel, Marina Brimioulle, Isabel Iglesias-Platas, Sophia Apostolidou, Reena Aggarwal, John C. Whittaker, Argyro Syngelaki, Kypros H. Nicolaides, Lesley Regan, David Monk, Philip Stanier

**Journal:** Philosophical Transactions B

**DOI:** 10.1098/rstb.2014.0074

### **Contents:**

|                                                                                                                   |   |
|-------------------------------------------------------------------------------------------------------------------|---|
| <b>Figure S1:</b> Association between CVS gene expression and factors influencing fetal growth .....              | 2 |
| <b>Figure S2:</b> Association between term placenta gene expression and factors influencing fetal growth.....     | 3 |
| <b>Table S1:</b> Medical details of participants in the Moore and the KCL CVS cohorts.....                        | 4 |
| <b>Table S2:</b> Correlation between gene expression in CVS and variables used in the regression model.....       | 5 |
| <b>Table S3:</b> Correlation between gene expression in term placenta and variables used in the regression model. | 5 |
| <b>Table S4:</b> Primer sequences for RT-qPCR.....                                                                | 6 |
| <b>Table S5:</b> Primer sequences for the imprinting analysis.....                                                | 7 |
| <b>References</b> .....                                                                                           | 7 |

Supplementary figures

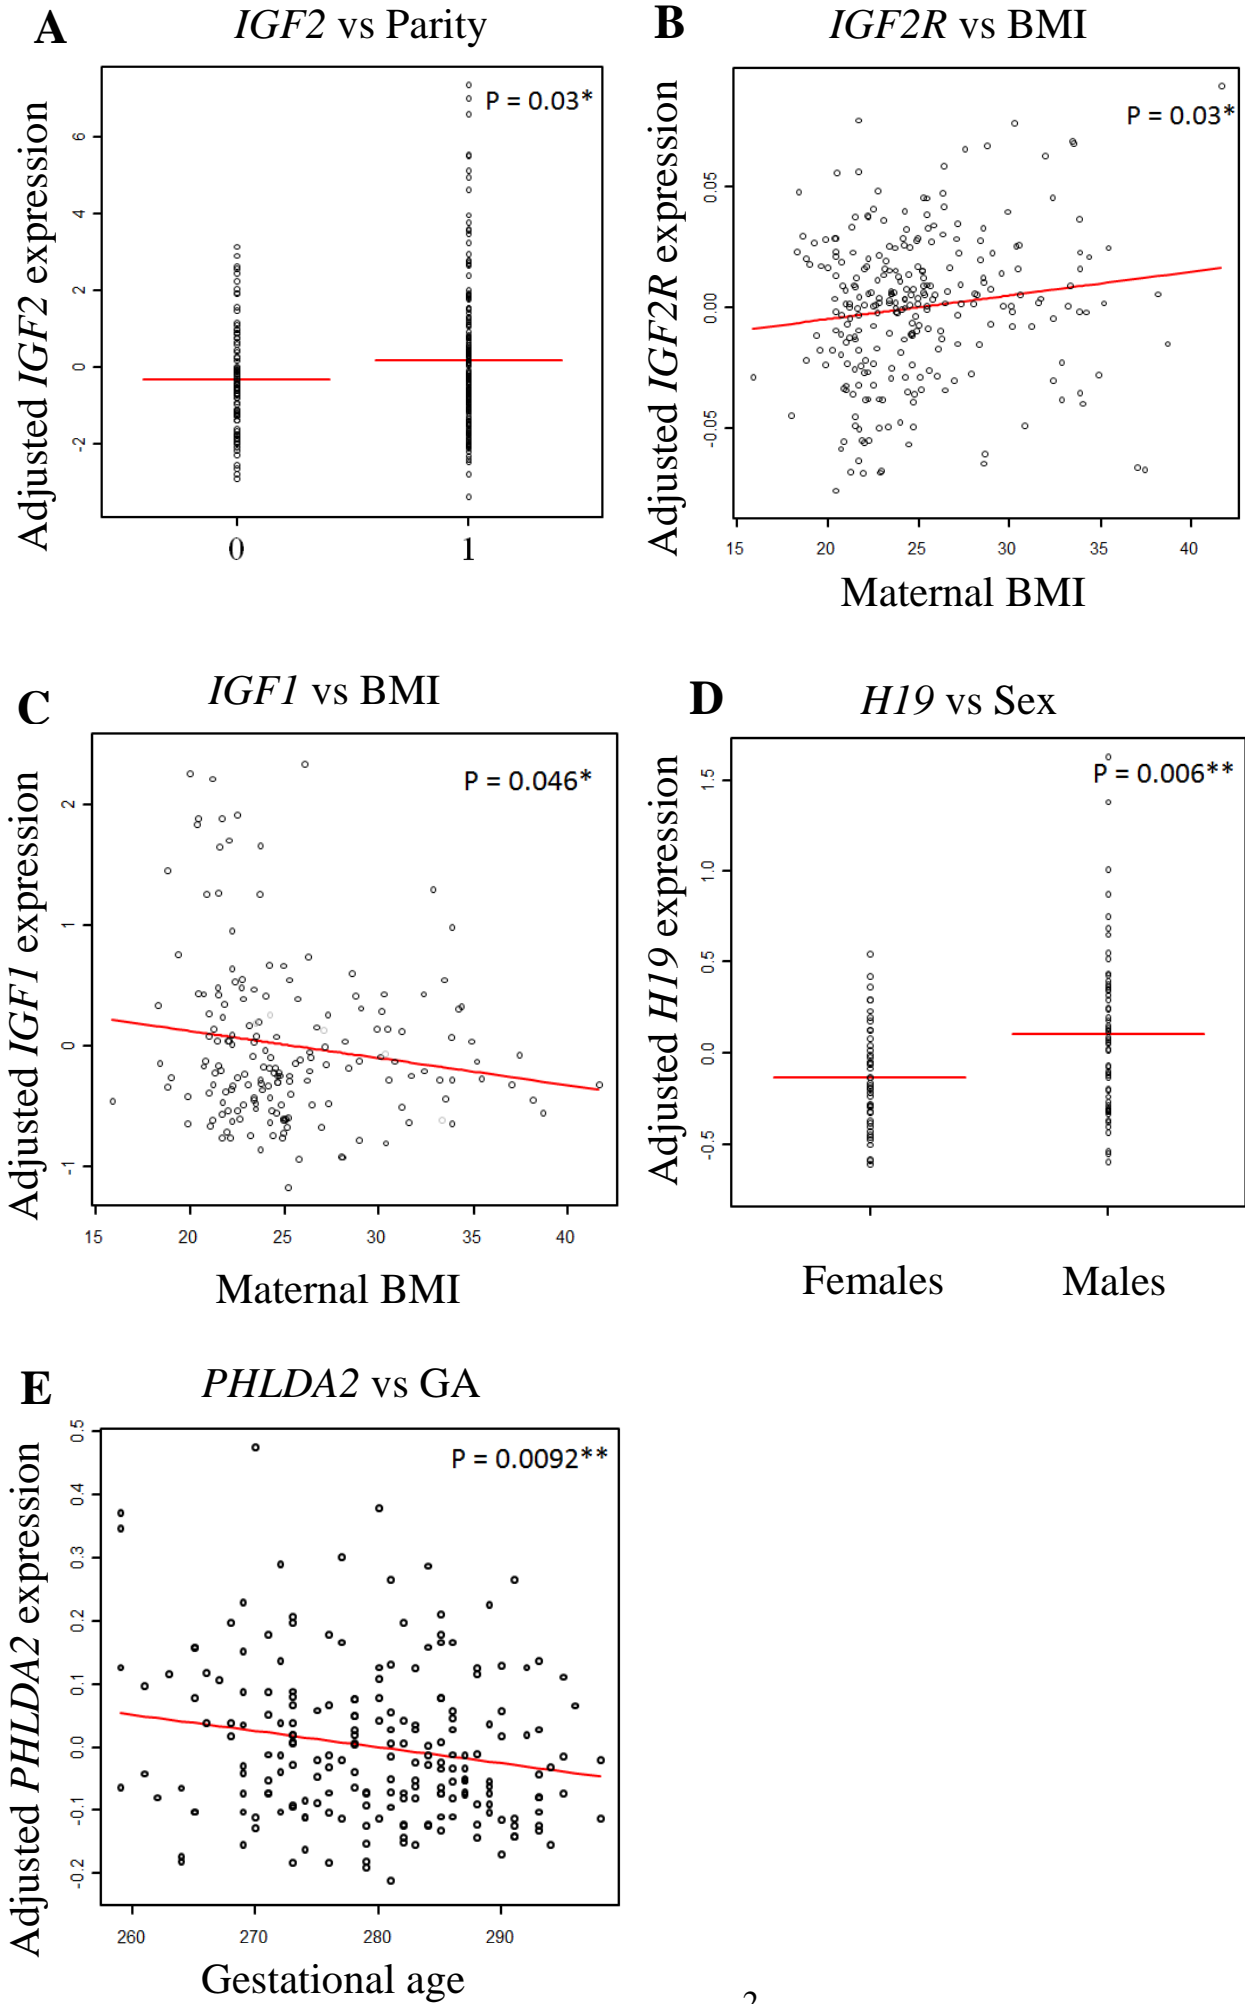

**Supplementary Figure 1. Association between CVS gene expression and factors influencing fetal growth.** The associations between gene expression in CVS tissue and the following variables were tested in the regression model; baby's sex, parity, gestational age at birth, maternal BMI and smoking. (A) *IGF2* is expressed higher in the parity > 1 group ( $P = 0.03$ ). Maternal BMI is positively and negatively correlated to (B) *IGF2R* ( $P = 0.03$ ) and (C) *IGF1* ( $P = 0.046$ ). (D) *H19* is expressed higher in males ( $P = 0.006$ ). (E) *PHLDA2* expression is higher as gestational age at birth (in days) advances ( $P = 0.0092$ ).

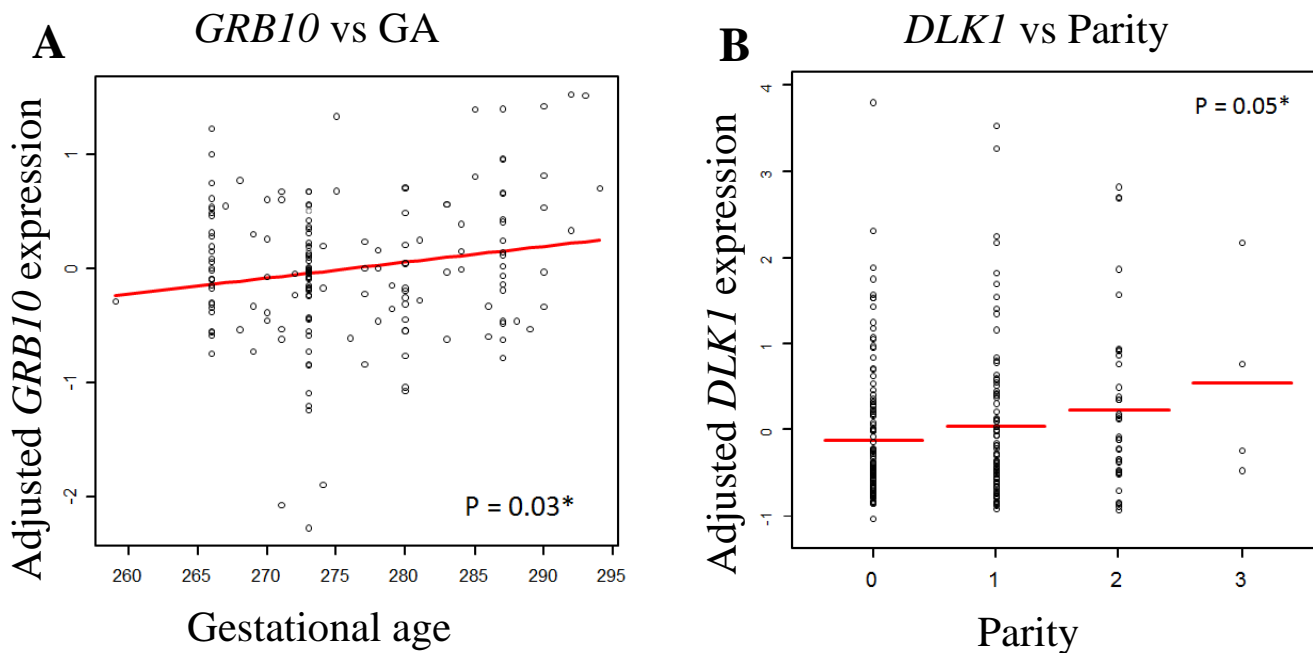

**Supplementary Figure 2. Association between term placenta gene expression and factors influencing fetal growth.** The influence of baby's sex, parity, gestational age at birth, maternal weight and smoking on imprinted genes expression in term placenta was tested using a regression model. Partial residual plots showing a positive correlation between gestational age (in days) at birth and (A) *GRB10* expression ( $P = 0.03$ ). Parity is positively correlated to (B) *DLK1* expression (para 1  $P = 0.47$ , para 2  $P = 0.05$  and para 3  $P = 0.12$ ).

## Supplementary tables

**Supplementary Table 1. Medical details of participants in the Moore and the KCL CVS cohorts.**

| Cohorts                      | Moore cohort   | KCL CVS cohort   |
|------------------------------|----------------|------------------|
| Sample number                | 302 trios      | 355              |
| <u>Maternal information:</u> |                |                  |
| Pre-pregnancy weight (Kg)    | 67 ± 11.7      | 67 ± 13          |
| Maternal BMI                 | NA             | 25 ± 4.4         |
| Maternal age (years)         | 34 ± 5         | 35.7 ± 5.6       |
| Smoking (% smokers)          | 27 (8.9 %)     | 33 (9 %)         |
| Parity                       | 0: 148 (49 %)  | 0: 93 (26 %)     |
|                              | 1: 99 (32 %)   | >1: 177 (50 %)   |
|                              | >2: 55 (18 %)  | NA: 85 (24 %)    |
| <u>Baby's information:</u>   |                |                  |
| Ethnicity:                   |                |                  |
| White European               | 302 (100 %)    | 251 (71 %)       |
| Black                        |                | 19 (5%)          |
| Asian                        |                | 11 (3%)          |
| Oriental                     |                | 9 (3%)           |
| Unknown                      |                | 65 (18 %)        |
| Gestational age at birth     | 39 ± 1 (weeks) | 279.4 ± 9 (days) |
| Gestational age at CVS       | NA             | 89.6 ± 4.2       |
| Gender (% males)             | 51 %           | 54 %             |
| Crown rump length (mm)       | NA             | 66.9 ± 8         |
| Birth weight (g)             | 3,432 ± 453    | 3,507 ± 636      |
| Placental weight (g)         | 702 ± 137      | NA               |
| Head circumference (cm)      | 34.9 ± 1.5     | NA               |

Mean ± standard deviations. NA = information not available.

**Supplementary Table 2. Correlation between gene expression in CVS and variables used in the regression model.**

| Gene          | Mat BMI       | Sex           | Parity       | GA at term      | Smoking |
|---------------|---------------|---------------|--------------|-----------------|---------|
| <i>IGF2</i>   | 0.45          | 0.38          | <b>0.03*</b> | 0.39            | 0.42    |
| <i>IGF2R</i>  | <b>0.03*</b>  | 0.62          | 0.56         | 0.33            | 0.48    |
| <i>IGF1</i>   | <b>0.046*</b> | 0.13          | 0.07         | 0.89            | 0.99    |
| <i>IGF1R</i>  | 0.067         | 0.97          | 0.87         | 0.5             | 0.45    |
| <i>PHLDA2</i> | 0.92          | 0.62          | 0.63         | <b>0.0092**</b> | 0.28    |
| <i>DLK1</i>   | 0.74          | 0.28          | 0.71         | 0.11            | 0.88    |
| <i>H19</i>    | 0.14          | <b>0.006*</b> | 0.95         | 0.65            | 0.74    |

GA = gestational age (days), BMI = body mass index.

**Supplementary Table 3. Correlation between gene expression in term placenta and variables used in the regression model.**

| Gene              | MW    | Sex   | Para 1          | Para 2        | Para 3 | GA            | Smoking |
|-------------------|-------|-------|-----------------|---------------|--------|---------------|---------|
| <i>IGF2</i>       | 0.31  | 0.42  | 0.12            | 0.098         | 0.85   | 0.54          | 0.29    |
| <i>IGF2R</i>      | 0.88  | 0.56  | 0.2             | 0.71          | 0.43   | 0.53          | 0.41    |
| <i>PHLDA2</i>     | 0.099 | 0.084 | 0.12            | 0.83          | 0.56   | 0.51          | 0.25    |
| <i>MEST</i>       | 0.99  | 0.96  | 0.33            | 0.93          | 0.26   | 0.94          | 0.27    |
| <i>H19</i>        | 0.64  | 0.65  | 0.065           | 0.78          | 0.64   | 0.84          | 0.81    |
| <i>GRB10</i>      | 0.63  | 0.55  | 0.35            | 0.31          | 0.62   | <b>0.036*</b> | 0.46    |
| <i>DLK1</i>       | 0.87  | 0.71  | 0.47            | <b>0.05*</b>  | 0.13   | 0.16          | 0.099   |
| <i>MEG3</i>       | 0.622 | 0.262 | 0.700           | 0.165         | 0.696  | 0.939         | 0.913   |
| <i>PEG10</i>      | 0.2   | 0.7   | 0.92            | 0.22          | 0.99   | 0.53          | 0.47    |
| <i>PEG3</i>       | 0.4   | 0.95  | <b>0.0019**</b> | <b>0.014*</b> | 0.061  | 0.18          | 0.16    |
| <i>SLC22A18</i>   | 0.57  | 0.4   | 0.97            | 0.09          | 0.7    | 0.99          | 0.12    |
| <i>CDKN1C</i>     | 0.41  | 0.085 | 0.14            | 0.85          | 0.14   | 0.94          | 0.96    |
| <i>PLAGL1_all</i> | 0.43  | 0.83  | 0.66            | 0.38          | 0.23   | 0.3           | 0.77    |
| <i>PLAGL1_imp</i> | 0.4   | 0.83  | 0.39            | 0.64          | 0.78   | <b>0.018*</b> | 0.64    |
| <i>IGFBP3</i>     | 0.33  | 0.84  | 0.002           | 0.62          | 0.43   | 0.56          | 0.8     |

GA = gestational age (days), MW = maternal weight, Para = parity.

**Supplementary Table 4. Primer sequences for RT-qPCR.**

| Gene              | Sequence 5' to 3'                                          | Size (bp) | Accession                    | Ref |
|-------------------|------------------------------------------------------------|-----------|------------------------------|-----|
| <i>L19</i>        | F: GCGGAAGGGTACAGCCAAT<br>R: CAGGCTGTGATACATGTGGCG         | 130       | NM_000981                    | (1) |
| <i>PEG10</i>      | F: TGTCTTCGCAGAGGAGTCCTCG<br>R: ACTTCTGTGGGGATGGAGGCC      | 105       | <a href="#">NM_001040152</a> | (2) |
| <i>PEG3</i>       | F: TGCAGCTTGCTGAAGACGATG<br>R: AAGATTCATCTTCACAAATCCC      | 211       | NM_006210                    | (2) |
| <i>DLK1</i>       | F: AGCACCTATGGGGCTGAATG<br>R: TCCCAGCCGTCGGTGCAAATGC       | 82        | NM_003836                    | (2) |
| <i>MEG3</i>       | F: ACGGCGGAGAGCAGAGAG<br>R: AGGAGAGACCCGGGTGAG             | 106       | NR_002766                    | MI  |
| <i>H19</i> (Term) | F: GGAGTTGTGGGAGACGGCCTTGAGT<br>R: CCAGTCACCCGGCCCAGATGGAG | 109       | NR_002196                    | (3) |
| <i>H19</i> (CVS)  | F: ACACTATGGCTGCCCTCTG<br>R: AGAGGGTTTTGTGTCCGGAT          | 100       | NR_002196                    | MI  |
| <i>PHLDA2</i>     | F: GAGCGCACGGGCAAGTA<br>R: CAGCGGAAGTCGATCTCCTT            | 68        | NM_003311                    | (1) |
| <i>GRB10</i>      | F: CACGAGCCCTTGCTGTTTA<br>R: AAGTCCCCTCCACCTTCTA           | 115       | NM_001001555                 | (2) |
| <i>IGFBP3</i>     | F: CGGTCTTCCTCCGACTCAC<br>R: GTCAACGCTAGTGCCGTCAG          | 91        | NM_000598.4                  | JMF |
| <i>SLC22A18</i>   | F: GCAGGATGAGCGCTTAGGC<br>R: GCACCCCGAAGGTGGTTTGC          | 168       | NM_183233                    | (2) |
| <i>CDKN1C</i>     | F: CAGCTGCACTCGGGGATTTTC<br>R: GATCTCTTGCGCTTGCGGAAG       | 125       | NM_000076                    | (2) |
| <i>PLAGL1_Imp</i> | F: AGCCGTGCTCACAGCTCAG<br>R: AGGCAGCAGCCACATTAGAC          | 200       | NM_001080954                 | II  |
| <i>PLAGL1_All</i> | F: GTGAGGAGTGTGGGAAGAAG<br>R: GAGGTGGTCCAGTAGCACCTC        | 140       | NM_001080951                 | II  |

Annealing temperature was set to 60°C for the all qPCR primers. MI = primer designed by Miho Ishida. JMF = primer designed by Jennifer May Frost. II = primer designed by Isabel Iglesias-Platas. Imp = imprinted isoform. All = all isoforms.

**Supplementary Table 5. Primer sequences for the imprinting analysis.**

| Gene                 | Sequence 5' to 3'                                                                          | Tm (°C) | Polymorphism            | Accession                       | Ref |
|----------------------|--------------------------------------------------------------------------------------------|---------|-------------------------|---------------------------------|-----|
| <i>DLK1</i> geno/RT* | F: CACCTGCGTGGATGATGAG<br>R: GATGGTGAAGCAGATGGCCTG                                         | 58      | rs1802710               | NM_003836                       | (2) |
| <i>MEG3</i> geno     | F: TCACCTGCTAGCAAAGTGGGA<br>R: GGCTGCCTCGTTTACATACA                                        | 58      | rs45617834<br>rs941575  | NR_002766                       | (2) |
| <i>MEG3</i> RT       | F: AAGGACCACCTCCTCTCCAT<br>R: AGGAGGTTGCTCTCATCGAC                                         | 56      |                         |                                 |     |
| <i>PEG3</i> geno/RT* | F: GAACCCTGTCAATATCTTTTTGAG<br>R: CATGAGAACCACCTTCAACAAAC                                  | 57      | rs1055359               | NM_001146184                    | (2) |
| <i>ACTB</i> geno/RT  | F: GTCTTCCCCTCCATCGTG<br>R: GGTCATCTTCTCGCGGTTG                                            | 59      | NA                      | NM_001101                       | ACT |
| <i>PEG10</i>         | F: ACAGAGATGTAAGAGGCAGGC<br>R: ATTCACAGCATTGTAAGAAGTTCAC                                   | 60      | rs13073<br>rs13226637   | NM_015068                       | MI  |
| <i>H19</i>           | F: CTCACCCACCGCAATTCATT<br>R: CCCTGGATGCTGTACTGTCT                                         | 59      | rs2067051               |                                 | MI  |
| <i>SLC22A18</i>      | F: CCCGATCAACTGGACTTTTG<br>R (Geno): GGCACGATGGAGAAGTGCATG<br>R (RT): GCACCCGAAGGTGGTTTGCA | 58      | rs1048046,<br>rs1048047 | NM_183233                       | (4) |
| <i>CDKN1C</i>        | F: CTAGCCAGCAGGCATCGAG<br>R: CTCATCGTGGATGTGCTG                                            | 58      | PAPn repeat             | NM_001122631                    | (4) |
| <i>PLAGL1</i>        | F: GAGCACCATTTAAAGGAACG<br>R: GGTTCTACCCAGACATGGACC                                        | 55      | rs2076684               | NM_006718_P1<br>NM_001080951_P2 | II  |

MI = primer designed by Miho Ishida. JMF = primer designed by Jennifer May Frost. II = primer designed by Isabel Iglesias-Platas. ACT = primer designed by Anna Clare Thomas.

#### Reference List

- (1) Apostolidou S, Abu-Amero S, O'Donoghue K, Frost J, Olafsdottir O, Chavele KM, et al. Elevated placental expression of the imprinted *PHLDA2* gene is associated with low birth weight. *J Mol Med (Berl)* 2007 Apr;85(4):379-87.
- (2) Frost JM, Monk D, Stojilkovic-Mikic T, Woodfine K, Chitty LS, Murrell A, et al. Evaluation of allelic expression of imprinted genes in adult human blood. *PLoS One* 2010;5(10):e13556.
- (3) Gicquel C, Rossignol S, Cabrol S, Houang M, Steunou V, Barbu V, et al. Epimutation of the telomeric imprinting center region on chromosome 11p15 in Silver-Russell syndrome. *Nat Genet* 2005 Sep;37(9):1003-7.
- (4) Monk D, Arnaud P, Apostolidou S, Hills FA, Kelsey G, Stanier P, et al. Limited evolutionary conservation of imprinting in the human placenta. *Proc Natl Acad Sci U S A* 2006 Apr 25;103(17):6623-8.
